# Supplementary material
Source: Springer Nature journal article supplement (https://www.springermedizin.de/resource/supplementary/12984_2008_199_MOESM1_ESM.pdf/9605512)

a)

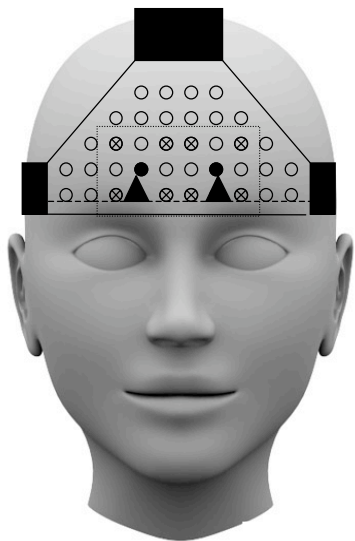

- ⊗ Source Pair
- Detector
- ▲ PF1/PF2 Locations

b)

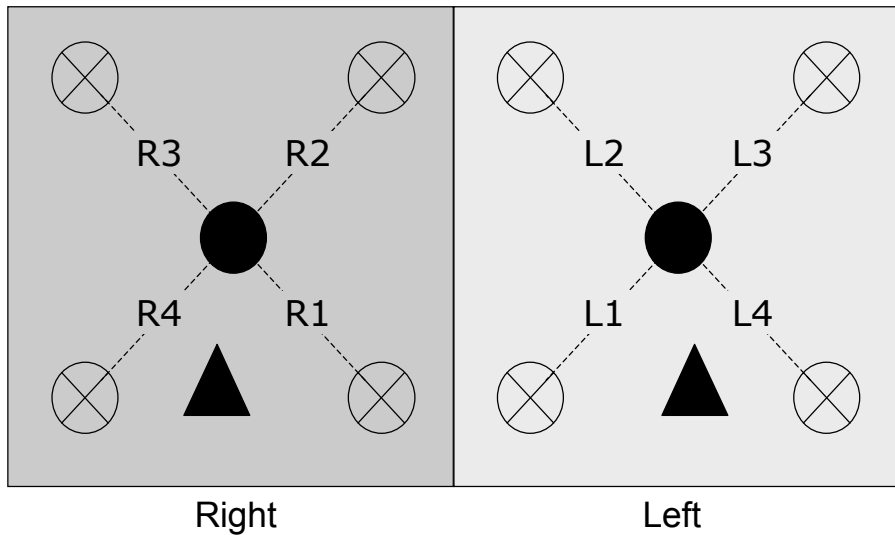

Supplement: MOESM1 [file 9605512]
